# Supplementary material for: Tissue-Specific Differences in the Development of Insulin Resistance in a Mouse Model for Type 1 Diabetes
Source: Oxford University Press journal article supplement (doi:10.2337/db13-1794), 2014-06-11

## SUPPLEMENTARY DATA

**Supplementary Table 1.** Glucose and lipid levels in the serum of WT, N-DM, A-DM and C-DM mice in the fed state.

|                           | WT        | N-DM      | A-DM                  | C-DM                 |
|---------------------------|-----------|-----------|-----------------------|----------------------|
| Glucose [mg/dl]           | 124±26    | 131±34    | 465±59 <sup>#§</sup>  | 490±22 <sup>#§</sup> |
| Triglyceride [mg/dl]      | 128±53    | 139±59    | 462±278 <sup>*‡</sup> | 178±39 <sup>‡</sup>  |
| Free fatty acids [mmol/l] | 0.87±0.30 | 0.77±0.40 | 1.32±0.84             | 1.07±0.24            |

All data are represented as means±SD. \*p<0.01 vs. WT, #p<0.001 vs. WT, ‡p<0.01 vs. N-DM, §p<0.001 vs. N-DM, †p<0.05 vs. A-DM by ANOVA with Bonferroni post hoc analysis or non-parametrical test (Mann-Whitney) with Hochberg post hoc analysis.

SUPPLEMENTARY DATA

**Supplementary Figure 1.** Determination of body fat storage and degradation in WT, N-DM, ADM and C-DM mice. (A and B) Total weights of liver, visceral fat and subcutaneous fat under fed (n=10 per group) and fasted (n=5-10 per group) conditions. (C and D) Triglyceride content in gastrocnemius muscle and liver of fed (n=5-12 per group) and fasted (n=5-12 per group) mice. (E and F) TBARS levels in gastrocnemius muscle and liver of fed (n=5-12 per group) and fasted (n=5 per group) mice. Data are represented as means±SEM. \*p<0.05, \*\*p<0.01 and \*\*\*p<0.001 by ANOVA with Bonferroni post hoc analysis.

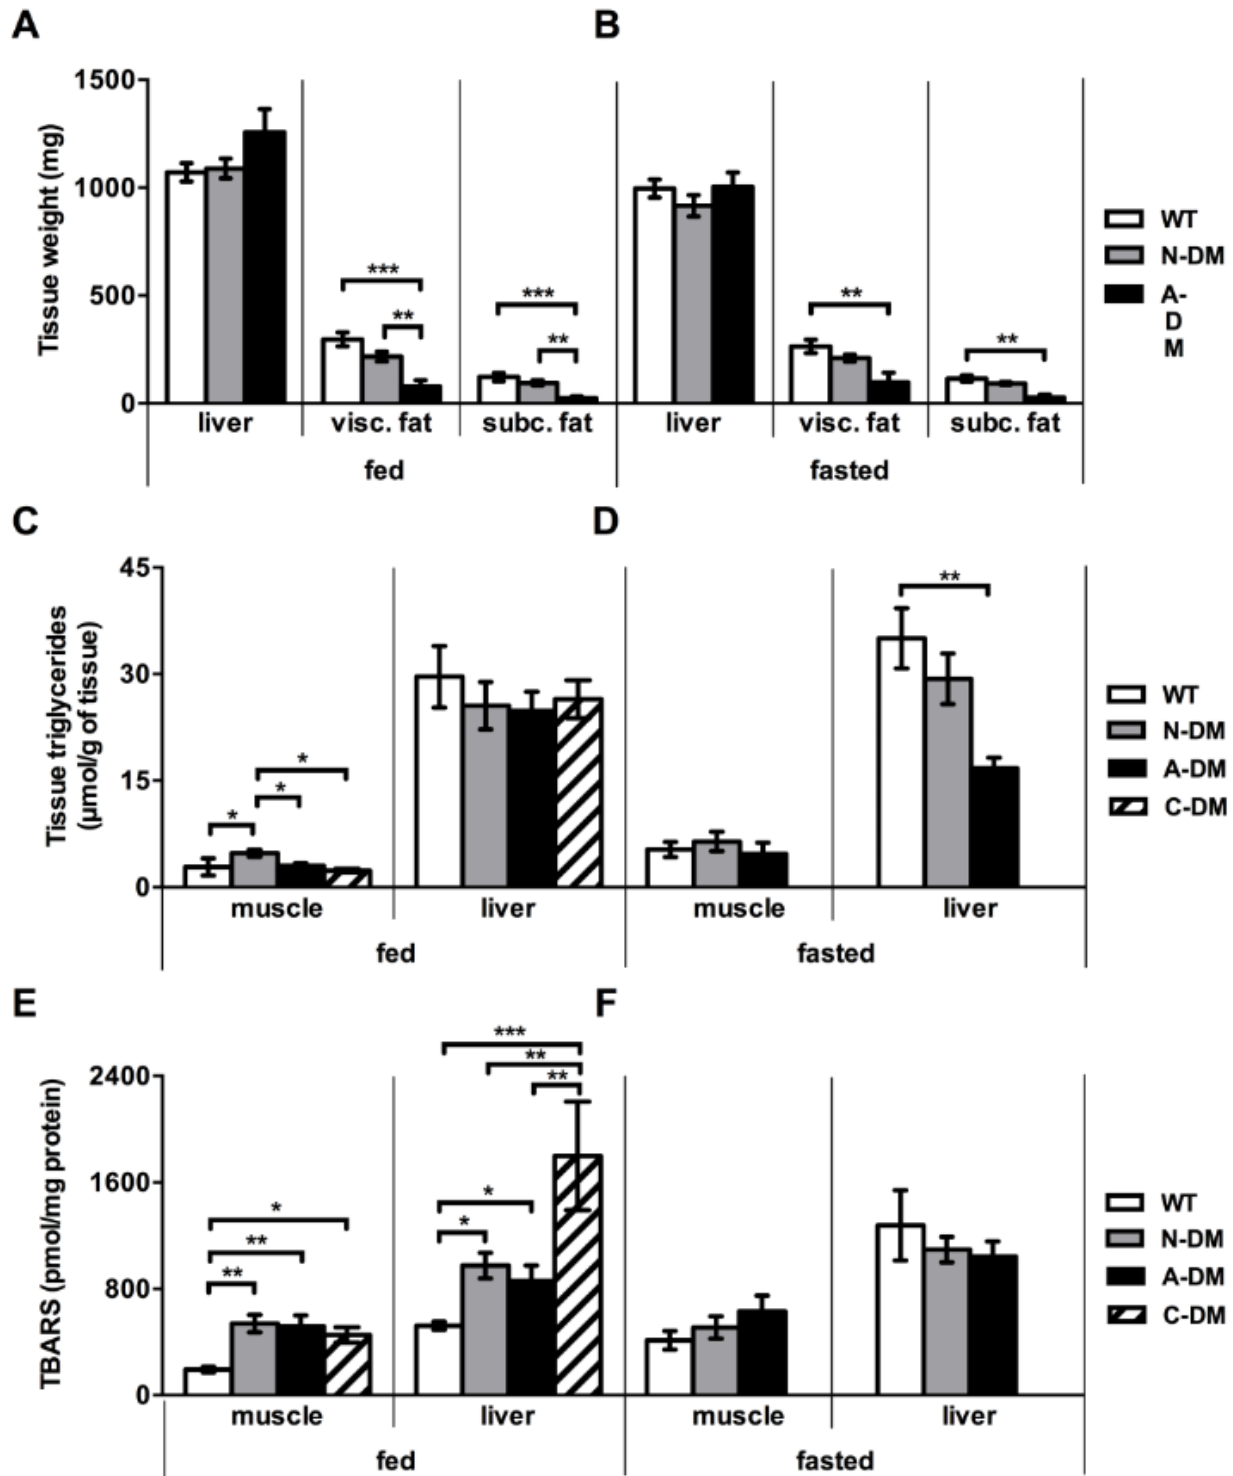

## SUPPLEMENTARY DATA

**Supplementary Figure 2.** Detection of lipid droplets with oil red O (ORO) staining in frozen liver sections. Liver sections of (A) WT, (B) N-DM and (C) A-DM mice at fasted state were stained by ORO for specific detection and quantification of lipids. Thereby, WT mice displayed the highest lipid content with ~30% ORO staining of total tissue area. Compared to this, N-DM showed decreased content with ~15% ORO-stained area. A-DM had the lowest lipid content with ~10% ORO-stained area of total section.

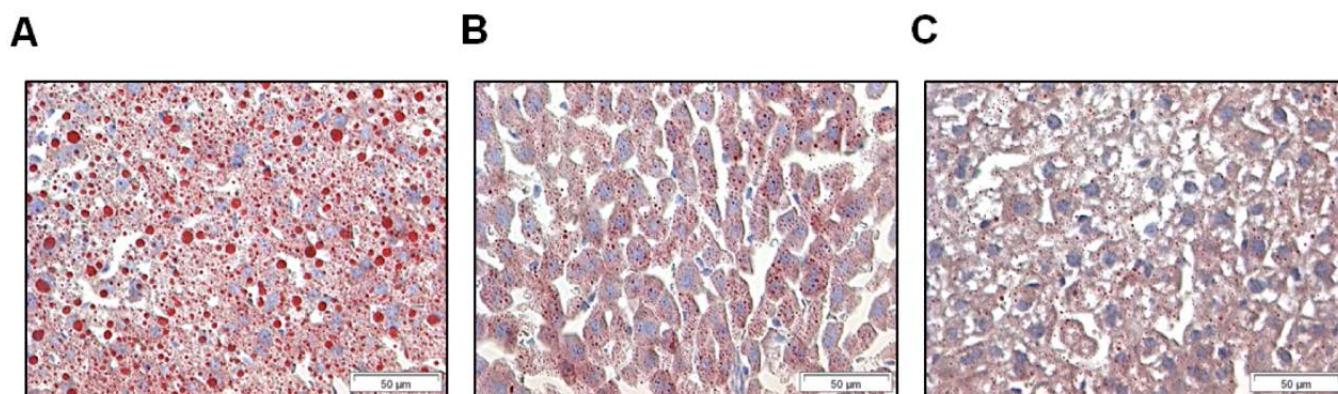

## SUPPLEMENTARY DATA

**Supplementary Figure 3.** Protein levels of cellular inflammatory pathway components in gastrocnemius muscle of WT, N-DM and A-DM mice. Basal (n=6 per group) levels of extracellular-signal regulated kinase phosphorylated at Thr202 and Tyr204 (ERK) (A), p38 mitogen-activated protein kinase phosphorylated at Thr180 and Tyr182 (p38MAPK) (B), nuclear factor 'kappa-lightchain-enhancer' of activated B-cells (NFκB) phosphorylated at Ser536 (C) and inhibitor of kappa B phosphorylated at Ser32 (pIκB) (D). Glyceraldehyde 3-phosphate dehydrogenase (GAPDH) was used as loading control for all proteins. Data are represented as means±SEM and tested by ANOVA with Bonferroni post hoc analysis.

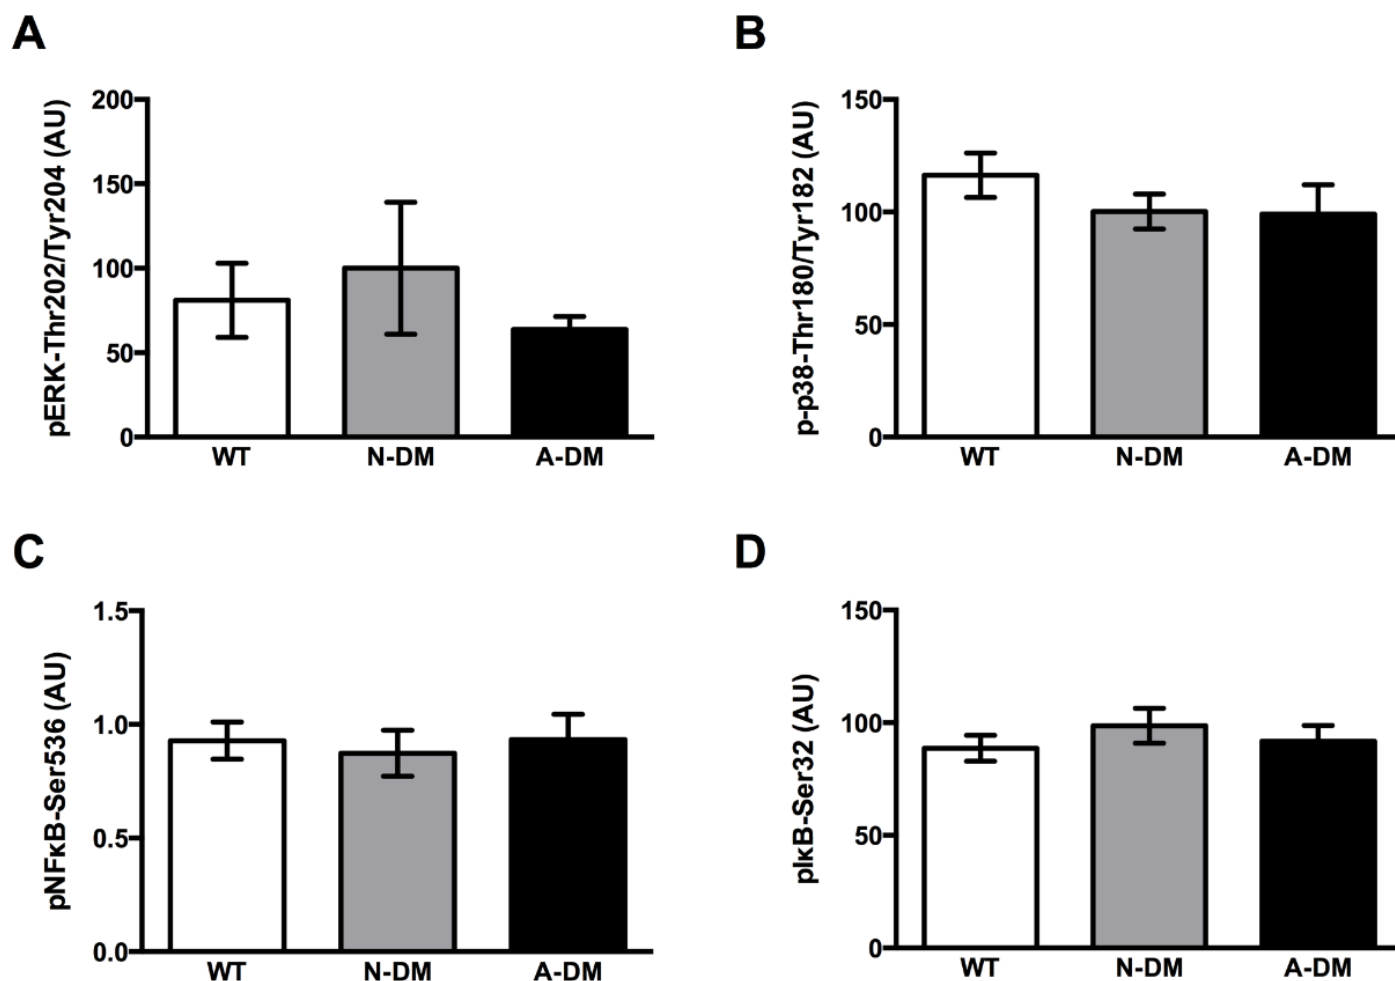

## SUPPLEMENTARY DATA

**Supplementary Figure 4.** Protein levels of cellular inflammatory pathway components in the liver of WT, N-DM and A-DM mice. Basal (n=6 per group) levels of extracellular-signal regulated kinase phosphorylated at Thr202 and Tyr204 (ERK) (A), p38 mitogen-activated protein kinase phosphorylated at Thr180 and Tyr182 (p38MAPK) (B), as well inhibitor of kappa B (IkB) (C) and its phosphorylated form at Ser32 (pIkB) (D). Glyceraldehyde 3- phosphate dehydrogenase (GAPDH) was used as loading control for all proteins. Data are represented as means $\pm$ SEM and tested by ANOVA with Bonferroni post hoc analysis.

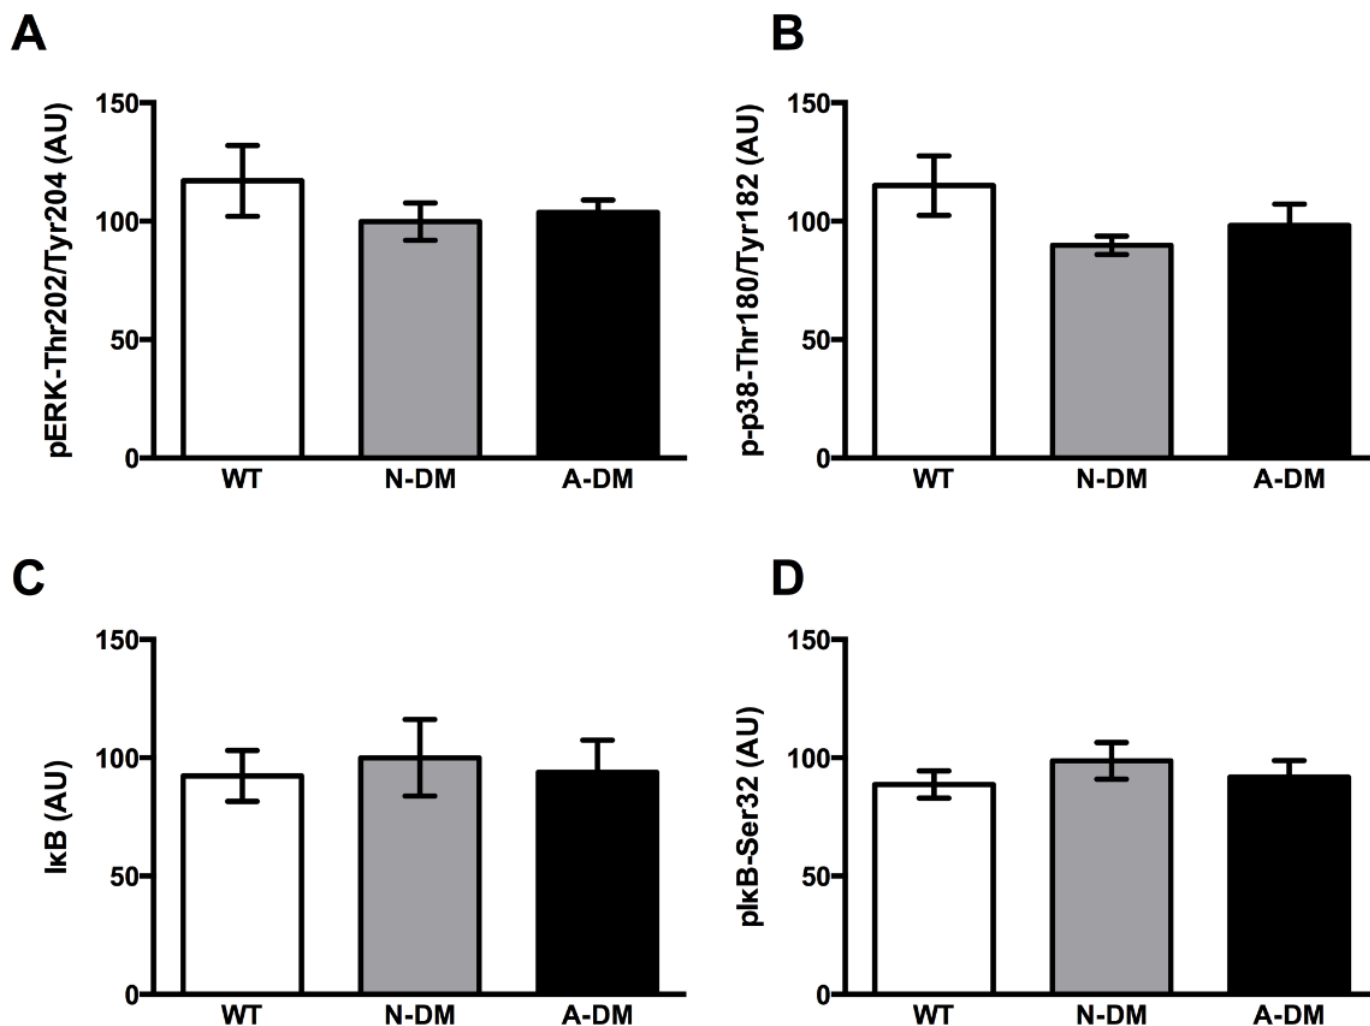

Supplement: db131794supplementarydata.pdf [file db131794supplementarydata.pdf]
